# Supplementary material for: Extremely efficient and stable hydrogen evolution by a Pt/NiOx composite film deposited on a nickel foam using a mixed metal-imidazole casting method
Source: Royal Society of Chemistry journal article supplement (doi:10.1039/d3ta06815c), 2023-12-29
Supplement: d3ta06815c1.pdf [file d3ta06815c1.pdf]

## Supporting Information

### Extremely efficient and stable hydrogen evolution by a Pt/NiO<sub>x</sub> composite film deposited on a nickel foam using a mixed metal-imidazole casting method

Zaki N. Zahran,<sup>a,b\*</sup> Yuta Tsubonouchi,<sup>a</sup> Debraj Chandra,<sup>a</sup> Tomoki Kanazawa,<sup>c</sup> Shunsuke Nozawa,<sup>c</sup> Eman A. Mohamed,<sup>a</sup> Norihisa Hoshino<sup>a</sup> and Masayuki Yagi,<sup>a\*</sup>

<sup>a</sup>Department of Materials Science and Technology, Faculty of Engineering, Niigata University, 8050 Ikarashi-2, Niigata 9050-2181, Japan.

<sup>b</sup>Faculty of Science, Tanta University, Tanta 511111, Egypt.

<sup>c</sup> Institute of Materials Structure Science, High Energy Accelerator Research Organization, 1-1 Oho, Tsukuba, Ibaraki, 305-0801, Japan

\*Correspondence to: [yagi@eng.niigata-u.ac.jp](mailto:yagi@eng.niigata-u.ac.jp) and [znzahran@eng.niigata-u.ac.jp](mailto:znzahran@eng.niigata-u.ac.jp)

#### Contents:

**Table S1.** Comparison of Pt-film(*w*) with the state-of-the-art Pt-based catalysts for HER performances.

**Figure S1.** XRD of NF before and after calcination at 450 °C.

**Figure S2.** SEM image of a bear NF surface.

**Figure S3.** EDS spectra of Pt-film(*w*) and Pt-film(*w/o*) on a NF substrate.

**Table S1.** Comparison of the Pt-film(*w*) electrode with the state-of-the-art Pt-based electrocatalysts with the excellent  $\eta^{10}$  values less than 200 mV for HER performances in 1.0 M KOH media (pH 14) <sup>a)</sup>.

| Catalysts                                               | Current collectors | $\Gamma_{\text{Pt}}$ (mg cm <sup>-2</sup> ) | Fabrication methods                | $\eta^{10} / \eta^{100}$ (mV) | Tafel slope (mV dec <sup>-1</sup> ) | Stability                                                                                                         | $j_m$ at $\eta = 50$ mV (A cm <sup>-2</sup> mg <sub>Pt</sub> <sup>-1</sup> ) | Ref. |
|---------------------------------------------------------|--------------------|---------------------------------------------|------------------------------------|-------------------------------|-------------------------------------|-------------------------------------------------------------------------------------------------------------------|------------------------------------------------------------------------------|------|
| Pt-film( <i>w</i> )                                     | NF                 | 1.08                                        | Drop casting/calcination           | 4.2/26.6                      | 23                                  | CP: $\eta^{10}$ and $\eta^{100}$ remained constant at $\sim 5.0$ and 27 mV for 60 h.                              | 0.42                                                                         | TW   |
| Pt                                                      | GC                 | 0.098                                       | Drop casting/calcination           | 60/170                        | 62                                  | CP: $\eta^{10}$ increased from 60 to 131 mV after 20 h.                                                           | 0.073                                                                        | S1   |
| Pt                                                      | FTO                | 0.098                                       | Drop casting/calcination           | 198/NA                        | 142                                 | CP: $\eta^{10}$ increased from 150 to 230 mV after 20 h.                                                          | NA                                                                           | S2   |
| Pt <sub>3</sub> Ni-NiS                                  | NF                 | $\sim 1.0$                                  | Electrophoretic                    | 12/73                         | 24                                  | CA: At $\eta = 12$ mV, $j$ remained constant at 10 mA cm <sup>-2</sup> for 192 h                                  | 0.075                                                                        | S3   |
| Pt                                                      | NF                 | $\sim 1.0$                                  | Electrophoretic                    | 22/107                        | 31                                  | CA: At $\eta = 22$ mV, $j$ decreased from 10 to 6 mA cm <sup>-2</sup> after 48h.                                  | 0.035                                                                        | S3   |
| Pt/NiO/Ni                                               | NF                 | 0.092                                       | Electrodeposition                  | 34/110                        | 39                                  | CP: $\eta^{10}$ increased from 34 to 55 mV after 24 h.                                                            | 0.220                                                                        | S4   |
| Pt/Ni                                                   | NF                 | 0.113                                       | Electrodeposition                  | 50/150                        | 56                                  | NA                                                                                                                | 0.090                                                                        | S4   |
| Pt-Ni <sub>3</sub> N                                    | Ni mesh            | 0.300                                       | LSV deposition                     | 50/110                        | 36.5                                | CA: At $\eta = 50$ mV, $j$ decreased from 10 to 8 mA cm <sup>-2</sup> after 24h.                                  | 0.033                                                                        | S5   |
| PtO <sub>2</sub> -Ni(OH) <sub>2</sub> NS                | Ti                 | 0.0755                                      | Hydrothermal                       | 80/280<br>70/250              | 89                                  | CP: $\eta^{20}$ remained constant at $\sim 300$ mV for 100 h.                                                     | 0.093<br>0.132                                                               | S6   |
| PtCo-Co                                                 | Ti mesh            | 0.0430                                      | Hydrothermal/calcination           | 28/105                        | 35                                  | CA: $j$ remained constant at 20 mA cm <sup>-2</sup> for 50 h, but $\eta$ was not shown.                           | 0.51                                                                         | S7   |
| Pt(111) modified by Ni(OH) <sub>2</sub>                 | Pt                 | NA                                          | Electrodeposition                  | 138/NA                        | 100-130                             | CA: At $\eta = 80$ and 110 mV, $j$ remained constant at 3.7 and 7.7 mA cm <sup>-2</sup> for 2.25 h, respectively. | NA                                                                           | S8   |
| Pt modified by Ni(OH) <sub>2</sub>                      | Pt                 | NA                                          | Chemical deposition                | $\sim 45$<br>( $\eta^5$ )/NA  | 75                                  | NA                                                                                                                | NA                                                                           | S9   |
| Pt <sub>SA</sub> -Co(OH) <sub>2</sub>                   | Ag                 | 0.059                                       | Cyclic voltametric deposition      | 29/104                        | 35.7                                | CP: $\eta^{20}$ remained constant at 65 mV for 50 h, but $\eta^{100}$ increased from 140 to 150 after 20 h.       | 0.42                                                                         | S10  |
| Pt <sub>13</sub> Cu <sub>73</sub> Ni <sub>14</sub> /CNF | C felt             | 6.653                                       | Impregnation/galvanic displacement | 67/NA                         | 54                                  | CA: At $\eta = 100$ mV, $j$ decreased by 18% of its initial value after 0.28 h                                    | 0.013                                                                        | S11  |
| Pt <sub>3</sub> Ni <sub>2</sub> NW-S/C                  | GC                 | 0.077                                       | Drop casting with                  | 51/NA                         | NA                                  | CP: $\eta^5$ increased from 30 to 40 after                                                                        | 0.120                                                                        | S12  |

|                                                               |             |        |                                    |                               |       |                                                                                   |      |            |
|---------------------------------------------------------------|-------------|--------|------------------------------------|-------------------------------|-------|-----------------------------------------------------------------------------------|------|------------|
| Pt-Ni AS                                                      | GC          | 0.0170 | Nafion<br>Drop casting with Nafion | 27.7/NA                       | 27    | 5h.<br>NA                                                                         | 1.50 | S13        |
| Pt <sub>3</sub> Ni/C                                          | GC          | 0.0100 | Drop casting with Nafion           | 63<br>( $\eta^5$ )/NA         | NA    | NA                                                                                | 0.31 | S14        |
| nanoframs/Ni(OH) <sub>2</sub><br>Pt NW/SL-Ni(OH) <sub>2</sub> | GC          | 0.0161 | Drop casting with Nafion           | 70<br>( $\eta^{2.5}$ )/N<br>A | NA    | NA                                                                                | 0.09 | S15        |
| Pt-BP/GR                                                      | GC          | 0.0143 | Drop casting with Nafion           | 21/80                         | 46.9  | NA                                                                                | 3.2  | S16        |
| Pt <sub>SA</sub> -NiO/Ni/Ag<br>NW                             | Flex. cloth | 0.0054 | Hydrothermal/<br>electrodeposition | 26/85                         | 27.1  | CP: $\eta^{20}$ remained constant at 40 mV for 30 h.                              | 6.85 | S17        |
| Pt <sub>SA</sub> -MoSe <sub>2</sub>                           | GC          | 0.0029 | Drop casting with Nafion           | 29/110                        | 41    | NA                                                                                | 5.17 | S18        |
| Pt <sub>SA</sub> -N-C                                         | GC          | 0.0063 | Drop casting with Nafion           | 46/220                        | 36.8  | CP: $\eta^{10}$ remained constant at 46 mV for 20 h.                              | 1.90 | S19        |
| Pt <sub>SA</sub> /AG                                          | GC          | 0.0311 | Drop casting with Nafion           | 12/NA                         | 30.6  | NA                                                                                | 0.80 | S20        |
| In-Pt <sub>SA</sub> NW/C                                      | GC          | 0.0128 | Drop casting with Nafion           | 46/NA                         | 32.4  | CP: $\eta^{10}$ remained constant at 46 mV for 5 h.                               | 0.86 | S21        |
| Hcp-Pt-Ni/C                                                   | GC          | 0.0076 | Drop casting with Nafion           | 65/NA                         | 78    | CA: At $\eta = 65$ mV, $j$ decreased from 10 to 5 mA cm <sup>-2</sup> after 1h.   | 1.60 | S22        |
| PtNi-O/C                                                      | GC          | 0.0051 | Drop casting with Nafion           | 40/105                        | 78.8  | CP: $\eta^{10}$ increased from 40 to 100 mV after 10 h.                           | 3.92 | S23        |
| Pt <sub>3,6</sub> Ni-S NW/C                                   | GC          | 0.0153 | Drop casting with Nafion           | 20/NA                         | 114.8 | CP: $\eta^5$ increased from 15 to 33 mV after 5 h.                                | 2.61 | S24        |
| PtNi NP/Ni NSA                                                | C cloth     | 0.0693 | Drop casting with Nafion           | 38/NA                         | 42    | CP: $\eta^{20}$ increased from 50 to 90 mV after 90 h.                            | NA   | S25        |
| Pt <sub>3</sub> Ni <sub>3</sub> NW/C-air                      | GC          | 0.0153 | Drop casting with Nafion           | 40/NA                         | NA    | CP: $\eta^5$ increased from 30 to 40 mV after 3 h.                                | 0.65 | S26,<br>27 |
| Pt <sub>1</sub> Ru <sub>1.54</sub> NC/BP                      | GC          | 0.0148 | Drop casting with Nafion           | 22/75                         | 19    | CP: At $\eta = 22$ mV, $j$ decreased from 10 to 7 mA cm <sup>-2</sup> after 20 h. | 3.38 | S28        |
| Pt-Co(OH) <sub>2</sub>                                        | C cloth     | 0.3900 | Electrodeposition                  | 32/115                        | 70    | CP: $\eta^5$ increased from 32 to 90 mV after 20 h,                               | 0.05 | S29        |
| Pt-Ni octahedra/C                                             | GC          | 0.0062 | Drop casting with                  | 70/NA                         | 59    | CP: $\eta^4$ increased from 25 to 50 mV                                           | 1.81 | S30        |

|                               |    |        |                                         |                       |    |                                                                                                  |      |     |
|-------------------------------|----|--------|-----------------------------------------|-----------------------|----|--------------------------------------------------------------------------------------------------|------|-----|
| Pt-2D-(NiOH) <sub>2</sub> /C  | GC | 0.0011 | Nafion<br>Drop casting with<br>3 Nafion | 180/NA                | 72 | after 1 h,<br>CA: At $\eta = 100$ mV, $j$ decreased by<br>49% of its initial value after 5.56 h. | 0.88 | S31 |
| PtNiCo alloy<br>nanohexapod/C | GC | 0.0100 | Drop casting with<br>Nafion             | 22( $\eta^5$ )<br>/NA | NA | NA                                                                                               | NA   | S32 |

<sup>a)</sup> GC: Grassy carbon, TW: this work, NA: not available, CP: chronopotentiometry, CA: chronoamperometry, NS: nanosheet, Pt<sub>SA</sub>:Pt single atom, CNF: carbon nanofiber, NW: nanowires, AS: anisotropic, SL: single layered, BP: black phosphorous, GR: graphite, N-C: nitrogen doped carbon, AG: aniline-stacked graphene, Hcp: hexagonal close-packed superstructure, NP nanoparticle, NSA: nanosheet array, air: thermally annealed in air, NC: nanocrystals, 2D: two dimensional.

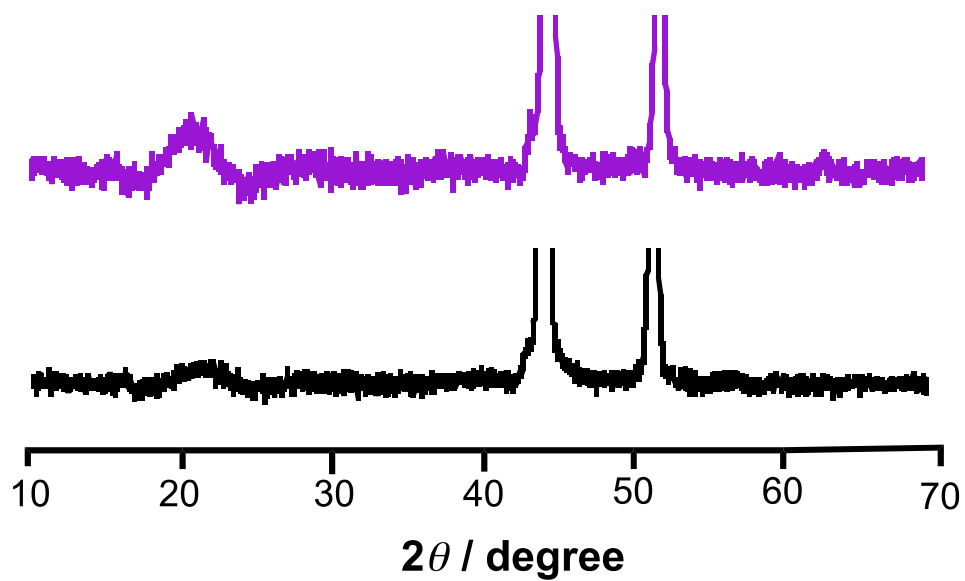

**Figure S1.** X-ray diffraction patterns (XRD) of the bare NF substrate before (black, below) and after (violet, above) calcination at 450 °C.

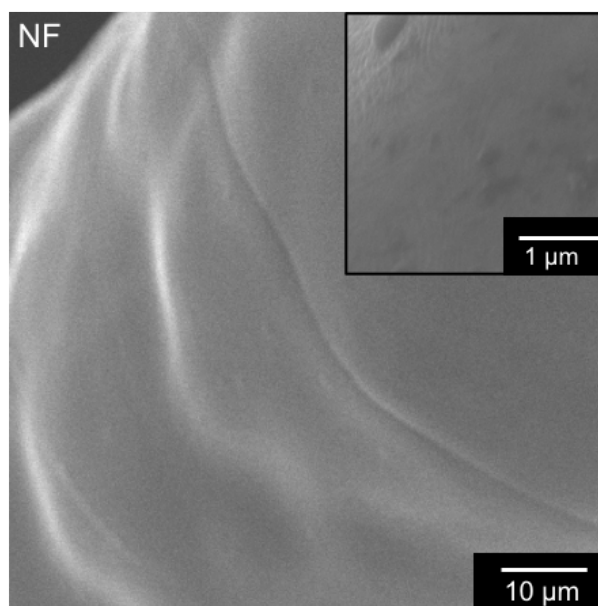

**Figure S2.** SEM image (top view) of the bare NF surface.

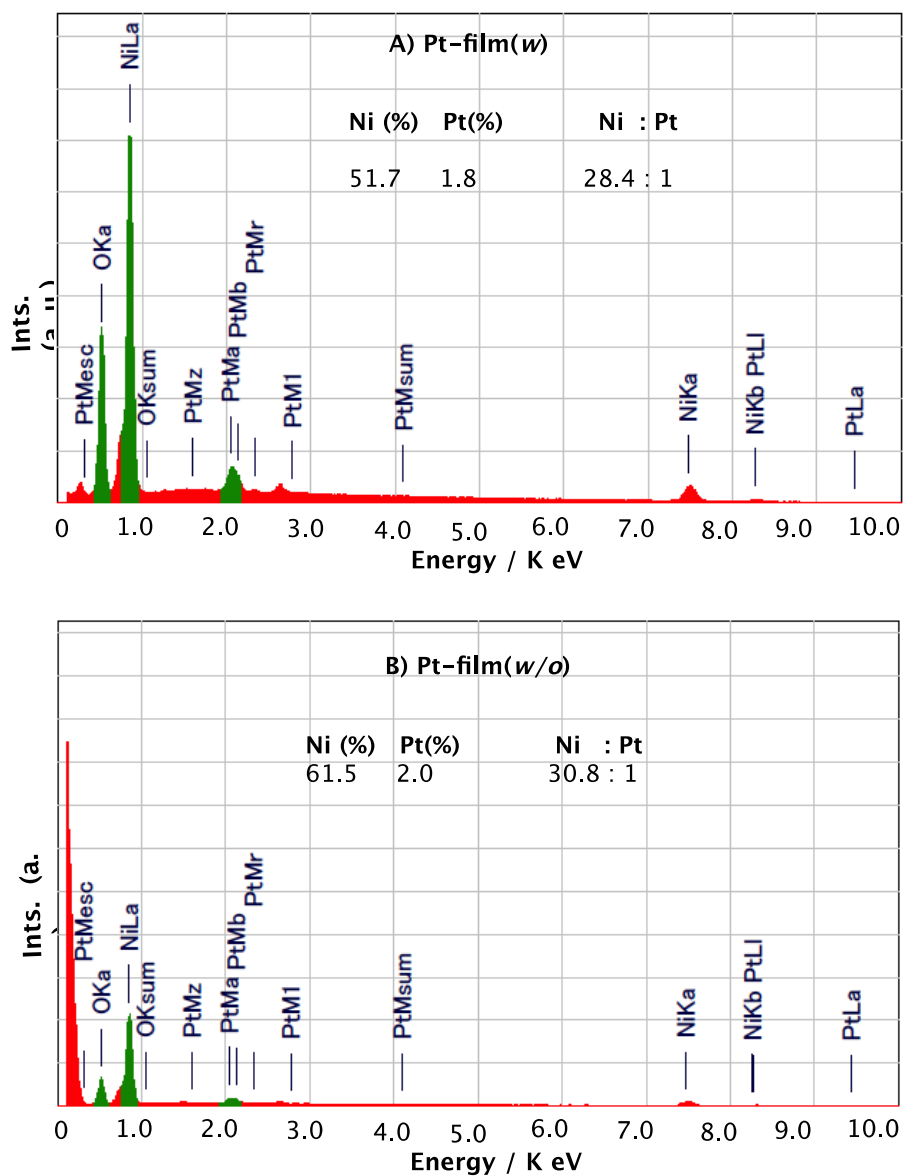

**Figure S3.** EDS spectra of (A) Pt-film(*w*) and (B) Pt-film(*w/o*) on the NF substrate, as measured with SEM observation.

## References

- S1 Z. N. Zahran, E. A. Mohamed, T. Katsuki, Y. Tsubonouchi, D. Chandra, N. Hoshino and M. Yagi, *Sustainable Energy Fuels*, 2022, **6**, 4265–4274.
- S2 Z. N. Zahran, E. A. Mohamed, T. Katsuki, Y. Tsubonouchi, D. Chandra, N. Hoshino and M. Yagi, *Int J Hydrogen Energy*, 2023.
- S3 C. Panda, P. W. Menezes, S. Yao, J. Schmidt, C. Walter, J. N. Hausmann and M. Driess, *J Am Chem Soc*, 2019, **141**, 13306–13310.
- S4 Z. J. Chen, G. X. Cao, L. Y. Gan, H. Dai, N. Xu, M. J. Zang, H. Bin Dai, H. Wu and P. Wang, *ACS Catal*, 2018, **8**, 8866–8872.
- S5 Y. Wang, L. Chen, X. Yu, Y. Wang and G. Zheng, *Adv Energy Mater*, 2017, **7**, 1601390.
- S6 L. Xie, X. Ren, Q. Liu, G. Cui, R. Ge, A. M. Asiri, X. Sun, Q. Zhang and L. Chen, *J Mater Chem A Mater*, 2018, **6**, 1967–1970.
- S7 Z. Wang, X. Ren, Y. Luo, L. Wang, G. Cui, F. Xie, H. Wang, Y. Xie and X. Sun, *Nanoscale*, 2018, **10**, 12302–12307.
- S8 R. Subbaraman, D. Tripkovic, D. Strmcnik, K. C. Chang, M. Uchimura, a P. Paulikas, V. Stamenkovic and N. M. Markovic, *Science*, 2011, **334**, 1256–1260.
- S9 N. Danilovic, R. Subbaraman, D. Strmcnik, K. C. Chang, A. P. Paulikas, V. R. Stamenkovic and N. M. Markovic, *Angewandte Chemie - International Edition*, 2012, **51**, 12495–12498.
- S10 K. L. Zhou, C. Wang, Z. Wang, C. B. Han, Q. Zhang, X. Ke, J. Liu and H. Wang, *Energy Environ. Sci.*, 2020, **13**, 3082–3092.
- S11 Y. Shen, A. C. Lua, J. Xi and X. Qiu, *ACS Appl Mater Interfaces*, 2016, **8**, 3464–3472.
- S12 P. Wang, X. Zhang, J. Zhang, S. Wan, S. Guo, G. Lu, J. Yao and X. Huang, *Nat Commun*, 2017, **8**, 14580.
- S13 Z. Zhang, G. Liu, X. Cui, B. Chen, Y. Zhu, Y. Gong, F. Saleem, S. Xi, Y. Du, A. Borgna, Z. Lai, Q. Zhang, B. Li, Y. Zong, Y. Han, L. Gu and H. Zhang, *Advanced Materials*, 2018, **30**, 1801741.
- S14 C. Chen, Y. Kang, Z. Huo, Z. Zhu, Huang. W., H. L. Xin, J. D. Snyder, D. Li, J. A. Herron, M. Mavrikakis, M. Chi, K. L. More, Y. Li, N. M. Markovic, G. A. Somojai, P. Yang and V. R. Stamenkovic, *Science*, 2014, **343**, 1339–1343.
- S15 H. Yin, S. Zhao, K. Zhao, A. Muqsit, H. Tang, L. Chang, H. Zhao, Y. Gao and Z. Tang, *Nat Commun*, 2015, **6**, 6430.
- S16 X. Wang, L. Bai, J. Lu, X. Zhang, D. Liu, H. Yang, J. Wang, P. K. Chu, S. Ramakrishna and X. F. Yu, *Angewandte Chemie - International Edition*, 2019, **58**, 19060–19066.
- S17 K. L. Zhou, Z. Wang, C. B. Han, X. Ke, C. Wang, Y. Jin, Q. Zhang, J. Liu, H. Wang and H. Yan, *Nat Commun*, 2021, **12**, 3783.
- S18 Y. Shi, Z. R. Ma, Y. Y. Xiao, Y. C. Yin, W. M. Huang, Z. C. Huang, Y. Z. Zheng, F. Y. Mu, R. Huang, G. Y. Shi, Y. Y. Sun, X. H. Xia and W. Chen, *Nat Commun*, 2021, **12**, 3021.
- S19 S. Fang, X. Zhu, X. Liu, J. Gu, W. Liu, D. Wang, W. Zhang, Y. Lin, J. Lu, S. Wei, Y. Li and T. Yao, *Nat Commun*, 2020, **11**, 1029.
- S20 S. Ye, F. Luo, Q. Zhang, P. Zhang, T. Xu, Q. Wang, D. He, L. Guo, Y. Zhang, C. He, X. Ouyang, M. Gu, J. Liu and X. Sun, *Energy Environ. Sci.*, 2019, **12**, 1000–1007.
- S21 Y. Zhu, X. Zhu, L. Bu, Q. Shao, Y. Li, Z. Hu, C. Te Chen, C. W. Pao, S. Yang and X. Huang, *Adv Funct Mater*, 2020, **30**, 2004310.
- S22 Z. Cao, Q. Chen, J. Zhang, H. Li, Y. Jiang, S. Shen, G. Fu, B. A. Lu, Z. Xie and L. Zheng, *Nat Commun*, 2017, **8**, 15131.

- S23 Z. Zhao, H. Liu, W. Gao, W. Xue, Z. Liu, J. Huang, X. Pan and Y. Huang, *J Am Chem Soc*, 2018, **140**, 9046–9050.
- S24 Z. Liu, J. Qi, M. Liu, S. Zhang, Q. Fan, H. Liu, K. Liu, H. Zheng, Y. Yin and C. Gao, *Angewandte Chemie - International Edition*, 2018, **57**, 11678–11682.
- S25 L. Xie, Q. Liu, X. Shi, A. M. Asiri, Y. Luo and X. Sun, *Inorg Chem Front*, 2018, **5**, 1365–1369.
- S26 P. Wang, K. Jiang, G. Wang, J. Yao and X. Huang, *Angewandte Chemie*, 2016, **128**, 13051–13055.
- S27 P. Wang, K. Jiang, G. Wang, J. Yao and X. Huang, *Angewandte Chemie - International Edition*, 2016, **55**, 12859–12863.
- S28 Y. Li, W. Pei, J. He, K. Liu, W. Qi, X. Gao, S. Zhou, H. Xie, K. Yin, Y. Gao, J. He, J. Zhao, J. Hu, T. S. Chan, Z. Li, G. Zhang and M. Liu, *ACS Catal*, 2019, 10870–10875.
- S29 Z. Xing, C. Han, D. Wang, Q. Li and X. Yang, *ACS Catal*, 2017, **7**, 7131–7135.
- S30 R. Kaviani, S. Il Choi, J. Park, T. Liu, H. C. Peng, N. Lu, J. Wang, M. J. Kim, Y. Xia and S. W. Lee, *J Mater Chem A Mater*, 2016, **4**, 12392–12397.
- S31 L. Wang, Y. Zhu, Z. Zeng, C. Lin, M. Giroux, L. Jiang, Y. Han, J. Greeley, C. Wang and J. Jin, *Nano Energy*, 2017, **31**, 456–461.
- S32 A. Oh, Y. J. Sa, H. Hwang, H. Baik, J. Kim, B. Kim, S. H. Joo and K. Lee, *Nanoscale*, 2016, **8**, 16379–16386.
